# Supplementary material for: Performance Assessment of Full-Scale Wastewater Treatment Plants Based on Seasonal Variability of Microbial Communities via High-Throughput Sequencing
Source: PLoS One. 2016 Apr 6;11(4):e0152998. doi: 10.1371/journal.pone.0152998 (PMC4822889; doi:10.1371/journal.pone.0152998)
Supplement: S5 Table — (XLSX) [file pone.0152998.s005.xlsx]

## Sheet: Sheet1
S5 Table Bray-Curtis similarity coefficients of microbial communities
	D2-Jun	D1-Jun	D3-Jun	L1-Jun	L2-Jun	L3-Jun	L4-Jun1	L4-Jun2	S1-Oct	L4-Oct	L1-Jan	L2-Jan	L4-Jan	D1-Jan1	D1-Jan2	D3-Jan	S1-Jan	L2-Apr	L3-Apr	D1-Apr	D2-Apr	D3-Apr	S1-Apr	L1-Oct	L3-Oct	L1-Apr	D1-Oct	D2-Oct	L2-Oct	D3-Oct	D2-Jan	L3-Jan	L4-Apr
D2-Jun	0	0.209728	0.3314	0.485368	0.462563	0.482863	0.468758	0.480754	0.53401	0.478645	0.541392	0.547192	0.553124	0.519905	0.54416	0.53401	0.558793	0.564065	0.53546	0.511468	0.56802	0.549829	0.513578	0.543633	0.514105	0.537833	0.530714	0.516346	0.527814	0.518323	0.512655	0.543369	0.530319
D1-Jun	0.209728	0	0.3169	0.507777	0.47324	0.487609	0.47759	0.494068	0.544556	0.493145	0.556552	0.558924	0.563934	0.522278	0.556815	0.532428	0.568547	0.575534	0.546138	0.517137	0.571052	0.546797	0.518982	0.558265	0.530319	0.551147	0.533483	0.523464	0.544951	0.518719	0.514896	0.557211	0.541128
D3-Jun	0.3314	0.3169	0	0.513314	0.502636	0.508041	0.512919	0.519641	0.563406	0.532033	0.542183	0.550751	0.564461	0.530319	0.55642	0.534669	0.552729	0.573029	0.540337	0.531374	0.587793	0.552597	0.517137	0.576457	0.56077	0.552333	0.565779	0.558793	0.568547	0.545215	0.531637	0.55352	0.533087
L1-Jun	0.485368	0.507777	0.513314	0	0.30464	0.309781	0.342341	0.411943	0.453071	0.419325	0.509096	0.540997	0.546401	0.501846	0.522014	0.538492	0.543633	0.508964	0.481809	0.536778	0.58463	0.556815	0.547324	0.373187	0.396124	0.476799	0.470472	0.471395	0.430266	0.47469	0.531769	0.537306	0.525837
L2-Jun	0.462563	0.47324	0.502636	0.30464	0	0.275244	0.279462	0.357369	0.44648	0.365805	0.505141	0.523332	0.524519	0.493936	0.513446	0.513973	0.529001	0.497364	0.470999	0.499736	0.549433	0.517269	0.508173	0.428157	0.395993	0.47759	0.446744	0.44358	0.403375	0.440021	0.514105	0.518587	0.49565
L3-Jun	0.482863	0.487609	0.508041	0.309781	0.275244	0	0.279858	0.361323	0.460322	0.408911	0.53401	0.554311	0.559847	0.528869	0.546665	0.546533	0.561956	0.524782	0.484445	0.52821	0.564856	0.547192	0.544951	0.459531	0.424202	0.503032	0.474822	0.474427	0.441471	0.478381	0.550883	0.555497	0.525442
L4-Jun1	0.468758	0.47759	0.512919	0.342341	0.279462	0.279858	0	0.304245	0.459531	0.377538	0.534669	0.549565	0.555233	0.504614	0.525046	0.535065	0.543106	0.527287	0.500659	0.502241	0.533483	0.529396	0.527155	0.466517	0.417611	0.506196	0.441076	0.443317	0.430662	0.455181	0.527683	0.554838	0.508964
L4-Jun2	0.480754	0.494068	0.519641	0.411943	0.357369	0.361323	0.304245	0	0.51595	0.450567	0.558661	0.569602	0.576588	0.542447	0.55352	0.562088	0.572502	0.556288	0.538228	0.546797	0.582257	0.568943	0.558793	0.518982	0.481149	0.543765	0.504614	0.498418	0.489586	0.509359	0.560902	0.571843	0.551674
S1-Oct	0.53401	0.544556	0.563406	0.453071	0.44648	0.460322	0.459531	0.51595	0	0.37556	0.51595	0.530451	0.531505	0.502373	0.516082	0.509755	0.514632	0.488532	0.484181	0.488663	0.534405	0.493936	0.492223	0.415634	0.375033	0.469813	0.365278	0.361587	0.397179	0.3488	0.507382	0.528869	0.492486
L4-Oct	0.478645	0.493145	0.532033	0.419325	0.365805	0.408911	0.377538	0.450567	0.37556	0	0.439889	0.460585	0.458608	0.434353	0.453731	0.44859	0.478909	0.420511	0.410888	0.43633	0.477327	0.464672	0.474031	0.337991	0.261007	0.41537	0.336805	0.34445	0.259953	0.31545	0.454917	0.462299	0.443976
L1-Jan	0.541392	0.556552	0.542183	0.509096	0.505141	0.53401	0.534669	0.558661	0.51595	0.439889	0	0.226865	0.233588	0.266675	0.264566	0.257316	0.308067	0.261798	0.27063	0.351569	0.509755	0.395729	0.355128	0.414579	0.438703	0.265225	0.492486	0.494068	0.43488	0.45874	0.285658	0.239784	0.299367
L2-Jan	0.547192	0.558924	0.550751	0.540997	0.523332	0.554311	0.549565	0.569602	0.530451	0.460585	0.226865	0	0.221329	0.297522	0.279989	0.26483	0.336936	0.271817	0.303058	0.373451	0.551938	0.411811	0.375297	0.443185	0.464804	0.290931	0.518587	0.521882	0.459531	0.490377	0.295544	0.222515	0.312154
L4-Jan	0.553124	0.563934	0.564461	0.546401	0.524519	0.559847	0.555233	0.576588	0.531505	0.458608	0.233588	0.221329	0	0.295413	0.281703	0.283417	0.3343	0.288558	0.301872	0.376483	0.538887	0.419984	0.375692	0.434616	0.462035	0.299763	0.516741	0.521487	0.460058	0.490113	0.30609	0.225811	0.323886
D1-Jan1	0.519905	0.522278	0.530319	0.501846	0.493936	0.528869	0.504614	0.542447	0.502373	0.434353	0.266675	0.297522	0.295413	0	0.243738	0.24532	0.286053	0.29159	0.278671	0.324941	0.464013	0.359214	0.324018	0.442921	0.441998	0.248484	0.455576	0.460849	0.447799	0.433166	0.242157	0.301213	0.289744
D1-Jan2	0.54416	0.556815	0.55642	0.522014	0.513446	0.546665	0.525046	0.55352	0.516082	0.453731	0.264566	0.279989	0.281703	0.243738	0	0.242288	0.31835	0.278408	0.301081	0.344846	0.495782	0.387951	0.355787	0.451358	0.462167	0.287899	0.47469	0.481149	0.463354	0.45584	0.253625	0.263907	0.291853
D3-Jan	0.53401	0.532428	0.534669	0.538492	0.513973	0.546533	0.535065	0.562088	0.509755	0.44859	0.257316	0.26483	0.283417	0.24532	0.242288	0	0.309386	0.28078	0.289744	0.331795	0.501846	0.361455	0.330082	0.462167	0.450171	0.283944	0.487872	0.490904	0.457026	0.451358	0.244661	0.262853	0.29159
S1-Jan	0.558793	0.568547	0.552729	0.543633	0.529001	0.561956	0.543106	0.572502	0.514632	0.478909	0.308067	0.336936	0.3343	0.286053	0.31835	0.309386	0	0.326918	0.308331	0.361455	0.481545	0.376483	0.251911	0.474558	0.477986	0.299104	0.507909	0.514105	0.471658	0.477854	0.351173	0.347087	0.296994
L2-Apr	0.564065	0.575534	0.573029	0.508964	0.497364	0.524782	0.527287	0.556288	0.488532	0.420511	0.261798	0.271817	0.288558	0.29159	0.278408	0.28078	0.326918	0	0.236752	0.342473	0.498286	0.375956	0.362246	0.419984	0.421962	0.242288	0.475613	0.475218	0.405747	0.442789	0.296204	0.273003	0.276694
L3-Apr	0.53546	0.546138	0.540337	0.481809	0.470999	0.484445	0.500659	0.538228	0.484181	0.410888	0.27063	0.303058	0.301872	0.278671	0.301081	0.289744	0.308331	0.236752	0	0.333245	0.47469	0.365146	0.3401	0.406011	0.404561	0.22937	0.472186	0.473899	0.39797	0.43633	0.310968	0.301476	0.274321
D1-Apr	0.511468	0.517137	0.531374	0.536778	0.499736	0.52821	0.502241	0.546797	0.488663	0.43633	0.351569	0.373451	0.376483	0.324941	0.344846	0.331795	0.361455	0.342473	0.333245	0	0.384524	0.277353	0.300949	0.482863	0.473372	0.342209	0.462035	0.462826	0.452412	0.439362	0.314263	0.365674	0.282494
D2-Apr	0.56802	0.571052	0.587793	0.58463	0.549433	0.564856	0.533483	0.582257	0.534405	0.477327	0.509755	0.551938	0.538887	0.464013	0.495782	0.501846	0.481545	0.498286	0.47469	0.384524	0	0.41893	0.440812	0.528605	0.504086	0.478777	0.487081	0.495914	0.490904	0.457685	0.496836	0.530714	0.44938
D3-Apr	0.549829	0.546797	0.552597	0.556815	0.517269	0.547192	0.529396	0.568943	0.493936	0.464672	0.395729	0.411811	0.419984	0.359214	0.387951	0.361455	0.376483	0.375956	0.365146	0.277353	0.41893	0	0.31769	0.513973	0.493145	0.370551	0.477327	0.473372	0.471395	0.444767	0.358687	0.408252	0.317295
S1-Apr	0.513578	0.518982	0.517137	0.547324	0.508173	0.544951	0.527155	0.558793	0.492223	0.474031	0.355128	0.375297	0.375692	0.324018	0.355787	0.330082	0.251911	0.362246	0.3401	0.300949	0.440812	0.31769	0	0.487741	0.484181	0.335486	0.500923	0.505537	0.468758	0.459794	0.335486	0.366992	0.280385
L1-Oct	0.543633	0.558265	0.576457	0.373187	0.428157	0.459531	0.466517	0.518982	0.415634	0.337991	0.414579	0.443185	0.434616	0.442921	0.451358	0.462167	0.474558	0.419984	0.406011	0.482863	0.528605	0.513973	0.487741	0	0.286976	0.39797	0.414184	0.413393	0.283812	0.392433	0.477986	0.439757	0.456499
L3-Oct	0.514105	0.530319	0.56077	0.396124	0.395993	0.424202	0.417611	0.481149	0.375033	0.261007	0.438703	0.464804	0.462035	0.441998	0.462167	0.450171	0.477986	0.421962	0.404561	0.473372	0.504086	0.493145	0.484181	0.286976	0	0.408516	0.375956	0.379383	0.254416	0.351305	0.473108	0.460981	0.453203
L1-Apr	0.537833	0.551147	0.552333	0.476799	0.47759	0.503032	0.506196	0.543765	0.469813	0.41537	0.265225	0.290931	0.299763	0.248484	0.287899	0.283944	0.299104	0.242288	0.22937	0.342209	0.478777	0.370551	0.335486	0.39797	0.408516	0	0.459531	0.458081	0.407461	0.422489	0.298708	0.299235	0.272476
D1-Oct	0.530714	0.533483	0.565779	0.470472	0.446744	0.474822	0.441076	0.504614	0.365278	0.336805	0.492486	0.518587	0.516741	0.455576	0.47469	0.487872	0.507909	0.475613	0.472186	0.462035	0.487081	0.477327	0.500923	0.414184	0.375956	0.459531	0	0.230688	0.390588	0.265357	0.479831	0.515028	0.480754
D2-Oct	0.516346	0.523464	0.558793	0.471395	0.44358	0.474427	0.443317	0.498418	0.361587	0.34445	0.494068	0.521882	0.521487	0.460849	0.481149	0.490904	0.514105	0.475218	0.473899	0.462826	0.495914	0.473372	0.505537	0.413393	0.379383	0.458081	0.230688	0	0.395597	0.279199	0.476404	0.515423	0.486554
L2-Oct	0.527814	0.544951	0.568547	0.430266	0.403375	0.441471	0.430662	0.489586	0.397179	0.259953	0.43488	0.459531	0.460058	0.447799	0.463354	0.457026	0.471658	0.405747	0.39797	0.452412	0.490904	0.471395	0.468758	0.283812	0.254416	0.407461	0.390588	0.395597	0	0.354864	0.477986	0.459135	0.438439
D3-Oct	0.518323	0.518719	0.545215	0.47469	0.440021	0.478381	0.455181	0.509359	0.3488	0.31545	0.45874	0.490377	0.490113	0.433166	0.45584	0.451358	0.477854	0.442789	0.43633	0.439362	0.457685	0.444767	0.459794	0.392433	0.351305	0.422489	0.265357	0.279199	0.354864	0	0.469681	0.482072	0.439494
D2-Jan	0.512655	0.514896	0.531637	0.531769	0.514105	0.550883	0.527683	0.560902	0.507382	0.454917	0.285658	0.295544	0.30609	0.242157	0.253625	0.244661	0.351173	0.296204	0.310968	0.314263	0.496836	0.358687	0.335486	0.477986	0.473108	0.298708	0.479831	0.476404	0.477986	0.469681	0	0.294622	0.30029
L3-Jan	0.543369	0.557211	0.55352	0.537306	0.518587	0.555497	0.554838	0.571843	0.528869	0.462299	0.239784	0.222515	0.225811	0.301213	0.263907	0.262853	0.347087	0.273003	0.301476	0.365674	0.530714	0.408252	0.366992	0.439757	0.460981	0.299235	0.515028	0.515423	0.459135	0.482072	0.294622	0	0.293435
L4-Apr	0.530319	0.541128	0.533087	0.525837	0.49565	0.525442	0.508964	0.551674	0.492486	0.443976	0.299367	0.312154	0.323886	0.289744	0.291853	0.29159	0.296994	0.276694	0.274321	0.282494	0.44938	0.317295	0.280385	0.456499	0.453203	0.272476	0.480754	0.486554	0.438439	0.439494	0.30029	0.293435	0
